# Supplementary material for: Discovery of a Novel Species Infecting Goats: Morphological and Molecular Characterization of Babesia aktasi n. sp
Source: MDPI journal article supplement (doi:10.3390/pathogens12010113), 2023-01-10
Supplement: s1 [file s1]

**Supplementary Table S1: Primers and probes used in the study.**

| Primers                              | Sequence (5'-3')                      | References |
|--------------------------------------|---------------------------------------|------------|
| Nbab-1F                              | AAGCCATGCATGTCTAAGTATAAGCTTTT         | [9]        |
| Nbab-1R                              | CTTCTCCTTCCTTTAAGTGATAAGGTTTAC        |            |
| RLB-F2                               | GACACAGGGAGGTAGTGACAAG                | [20]       |
| RLB-R2                               | biotin-CTAAGAATTTACCTCTGACAGT         |            |
| Ec9                                  | TACCTTGTTACGACTT                      | [18]       |
| Ec12a                                | TGATCCTGGCTCAGAACGAACG                |            |
| 16S8FE                               | GGAATTCAGAGTTGGATCMTGGYTACG           | [19]       |
| B-GA1B                               | biotin-CGGGATCCCGAGTTTGCCGGGACTTCTTCT |            |
| 8F                                   | AGAGTTTGATCCTGGCTCAG                  | [21]       |
| 1492R                                | GGTTACCTTGTTACGACTT                   |            |
| F2                                   | ACGAAAGTCTGATGGAGCAATA                | [22]       |
| R2                                   | ACGCCCAATAAATCCGRATAAT                |            |
| BaFor1                               | ATAGGATTCTATATGAGTAT                  |            |
| BaRev1                               | ATAATCAGGTATTCTCCTTGG                 | [23]       |
| BaFor2                               | TCTCTCATGGTTTAATTATGATAT              |            |
| BaRev2                               | TAGCTCCAATTGATAAAACAAAGTG             |            |
| <b>Probs</b>                         |                                       |            |
| Catchall                             | AmMC6-TAATGGTTAATAGGA(AG)C(AG)GTTG    | [58]       |
| <i>Theileria</i> spp.                | AmMC6-TGATGGGAATTTAAACC(CT)CTTCCA     | [59]       |
| <i>T. ovis</i>                       | AmMC6-TTTTGCTCCTTTACGAGTCTTTGC        | [59]       |
| <i>T. separate</i>                   | AmMC6-TCGGATGATACTTGATTATC            | [60]       |
| <i>T. lestoquardi</i>                | AmMC6-ATTGCTTGTTGCCCTCCG              | [60]       |
| <i>T. uilenbergi</i>                 | AmMC6-TGCATTTTCCGAGTGTTACT            | [60]       |
| <i>T. luwenshuni</i>                 | AmMC6-TCGGATGATACTTGATTATC            | [58]       |
| <i>Theileria</i> sp. OT1             | AmMC6-ATCTTCTTTTTGATGAGTTGGTGT        | [59]       |
| <i>Theileria</i> sp. OT3             | AmMC6-ATTTTCTCTTTTTATATGAGTTTT        | [59]       |
| <i>Theileria</i> sp. MK              | AmMC6-CATTGTTTCTTCTCATGTC             | [61]       |
| <i>Babesia</i> Catchall 1            | AmMC6-ATTAGAGTGTTTCAAGCAGAC           | [62]       |
| <i>Babesia</i> Catchall 2            | AmMC6-ACTAGAGTGTTTCAAACAGGC           | [62]       |
| <i>B. ovis</i>                       | AmMC6-GCGCGCGGCCCTTTGCGTTTACT         | [59]       |
| <i>B. motasi</i>                     | AmMC6-ATTGGAGTATTGCGCTTGCTTTTT        | [59]       |
| <i>B. crassa</i>                     | AmMC6-TTATGGCCCGTTGGCTTAT             | [59]       |
| <i>Babesia</i> sp.                   | AmMC6-TGCCGTGAATCGACATTCGTC           | [16]       |
| <i>Anaplasma/Ehrlichia</i> catch-all | AmMC6-GGG GGA AAG ATT TAT CGC TA      | [19]       |
| <i>A. phagocytophilum</i> 1          | AmMC6-TTGCTATAAAGAATAATTAGTGG         | [63]       |
| <i>A. phagocytophilum</i> 3          | AmMC6-TTGCTATGAAGAATAATTAGTGG         | [63]       |
| <i>A. phagocytophilum</i> 5          | AmMC6-TTGCTATAAAGAATAGTTAGTGG         | [63]       |
| <i>A. phagocytophilum</i> 7          | AmMC6-TTGCTATAGAGAATAGTTAGTGG         | [63]       |
| <i>A. phagocytophilum</i> A-HGE      | AmMC6-GCTATAAAGAATAGTTAGTGG           | [63]       |
| <i>A. phagocytophilum</i> A-D- HGE   | AmMC6-GCTATGAAGAATAGTTAGTG            | [63]       |
| <i>A. ovis</i>                       | AmMC6-ACC GTA CGC GCA GCT TG          | [19]       |

AmMC6: Amino group
